1 Climatic niches in phylogenetic comparative studies: a review of  
2 challenges and approaches

3 Lara Budic<sup>1</sup> and Carsten F. Dormann<sup>1</sup>

4 Running title: Climatic niche in phylogenetic comparative studies

5 <sup>1</sup>Faculty of Environment and Natural Resources, University of Freiburg, Tennenbacher Str. 4,  
6 79106 Freiburg

7 *Corresponding author:*

8 Lara Budic

9 e-mail: [lara.budic@biom.uni-freiburg.de](mailto:lara.budic@biom.uni-freiburg.de)

10 Key words: Climatic niche, phylogenetic comparative studies, ancestral niche reconstruction,  
11 evolutionary models

12 **Abstract** Studying the evolution of climatic niches through time in a phylogenetic  
13 comparative framework combines species distribution modeling with phylogenies.  
14 Phylogenetic comparative studies aid the understanding of the evolution of species'  
15 environmental preferences by revealing the underlying evolutionary processes and causes,  
16 detecting the differences among groups of species or relative to evolutionary pattern of other  
17 phenotypic traits, but also act as a yardstick to gauge the adaptational potential under  
18 climate change. Because several alternatives exist on how to compute and represent the  
19 climatic niche, we here review and discuss the current state of the art and propose a best  
20 practice to use in comparative studies. Moreover we outline the common evolutionary models  
21 and available model-fitting methods and describe the procedure for ancestral niche  
22 reconstruction with the intention to give a broad overview and highlight the most advanced  
23 approaches for optimal niche-related comparative studies.

## 24 Introduction

25

26 Phylogenetic comparative studies use a wide range of methods to explore patterns and  
27 processes linked to phylogenetic trees and species traits (Pennell and Harmon, 2013). These  
28 studies uncover how a certain trait evolves among different taxa, how evolution of one trait  
29 influences another, whether a trait represents adaptation to the environment etc. In this  
30 review we focus exclusively on studies testing hypotheses about species' climatic niches  
31 evolution through phylogeny.

32 The aim of such studies is typically not only to suggest the trajectories of niche evolution,  
33 but rather to test specific hypothesis about the timing of appearance, causation or  
34 evolutionary processes responsible for observed patterns. Such studies aim to discover, for  
35 instance, whether shifts in the climate niche occur at the same time as shifts in a particular  
36 trait (such as C3/C4 photosynthesis: Edwards and Smith, 2010), whether it was a key driver  
37 for developing specific life-histories (e.g. cactus life-form: Edwards and Donoghue, 2006), or  
38 whether temporal and/or spatial fluctuation of climate caused species to evolve and diversify  
39 (Evans et al., 2009). Furthermore, linking climate niche evolution to population demography  
40 through time could reveal whether major niche shifts occur in small or large populations  
41 (Jakob et al., 2010). The analyses are based on current trait values, the phylogenetic  
42 relationship between species and an evolutionary model. Climate niche is treated as if it was a  
43 phenotypic trait and the analysis of, say, temperature values follows the same logic as  
44 evolutionary analysis of body mass. The actual reconstruction of ancestral trait values is  
45 unnecessary for testing correlations between characters. Being an integral part of the  
46 procedure, ancestral states along the phylogeny are implicitly inferred but not actually  
47 presented. However, other hypotheses might require reconstruction of ancestral values, such as  
48 tests of niche overlap between specific ancestral nodes, pinpointing the exact time of  
49 appearance of certain values, identifying reversals in evolutionary progression or visualization  
50 of trait changes through time.

51 Given that understanding the evolution of species' niches through time attracts extensive  
52 interest and is highlighted as a priority research question in paleoecology (Seddon et al.,  
53 2014), we discuss and propose guidelines for optimal use of species distribution and climatic  
54 data in comparative studies.

55 The aim of this review is to (1) introduce the concepts relating niche space to its evolution  
56 through time, (2) discuss and propose the optimal niche representation to be used in  
57 phylogenetic comparative studies, (3) introduce most common evolutionary models (4)  
58 describe the methods for ancestral reconstruction and discuss future directions of the field.

### 59 **Climate niche in space and time**

60 Hutchinson (1957, 1978) defined a species' fundamental niche as all combinations of  
61 environmental conditions where a species can persist and maintain a viable population in the  
62 absence of predators or competitors (Kearney and Porter, 2004). Although the ecological  
63 niche is not strictly a heritable phenotypic trait for which these methods were developed,  
64 niche characteristics are defined and constrained by species physiology, which *is* heritable, and  
65 as such can be analyzed in a phylogenetic framework (Kozak and Wiens, 2010a).

66 Biologists are generally interested in the "fundamental niche", which represents species  
67 physiological limits and is the actual evolvable trait, although what we actually observe in  
68 nature is the "realized niche". Unfortunately we are currently unable to determine the  
69 fundamental niche without manipulative experimental studies, so we are bound to analyse the  
70 realized niche, a restricted section where a species lives, limited by biotic interaction or  
71 dispersal limitation (Jackson and Overpeck, 2000; Soberón and Nakamura, 2009).

72 It is currently impossible to tell how closely the realized niche approximates the  
73 fundamental niche, and for this reason it is difficult to guess whether the observed change  
74 really demonstrates niche evolution, or if this change is merely a shift of the realized niche  
75 within the species' fundamental niche (e.g. due to changed biotic interactions: Graham et al.,  
76 2004; Dormann et al., 2010). High within-species plasticity (e.g. in mammals, Réale et al.,  
77 2003) may lead to changes in realised habitats as biotic and/or abiotic conditions change.

78 A further complication is introduced by the existence of no-analog climate conditions at  
79 different time slices, e.g. in the past (Williams et al., 2001) or future (Williams et al., 2007,  
80 see Fig.1), which indicates that only a portion of a species' fundamental climatic niche  
81 (termed "potential niche") actually exists in the world at a given time. Therefore, whole  
82 sections of fundamental niche might be unobserved because they are nonexistent in space at  
83 that time (Fig. 1). Moreover, in the presence of facilitative biotic interactions or mutualism,  
84 species' niche could even extend beyond the fundamental niche (e.g. in lichens or corals; see  
85 Fig. 1, Bruno et al., 2003; Afkhami et al., 2014). Given the tremendous complexity of

86 confounding factors it seems incredibly difficult to be certain how to interpret the observed  
87 change in the climate niche. Distinguishing evolutionary change from shifts within unknown  
88 niche limits certainly merits attention, and comparative studies could potentially disentangle  
89 one from another: if a trait tightly linked to physiology changes along with the niche  
90 (assuming this change is at the genetic level, i.e. it goes beyond phenotypic plasticity), this  
91 could indicate the species is adapting to new environmental conditions, and hence its niche is  
92 evolving. For example, Edwards and Smith (2010) found that the origin of C4 photosynthesis  
93 in grasses coincided with shifts to drier environments. Without considering the exact  
94 mechanism, or excluding other hypotheses, it should be reasonable to interpret this finding as  
95 species adaptation to novel climate conditions (i.e. evolutionary change of the fundamental  
96 niche). In this review we consider the “realized” niche, since this is the most common  
97 situation for which we have data although we acknowledge it is far from a consistent  
98 approximation of the fundamental niche, and encourage using direct physiological estimates of  
99 climatic tolerance whenever available.

## 100 Representing the climatic niche

101 To test hypotheses about the climatic niche in phylogenetic comparative methods, it is  
102 necessary to infer the present climate niche of extant species. There is no standard protocol  
103 and the way the niche is represented varies widely among studies. For example, some authors  
104 represent the niche with climate niche models (Graham et al., 2004; Yesson and Culham,  
105 2006a,b; Eaton et al., 2008; Dormann et al., 2010), others use raw climate data (Evans et al.,  
106 2005; Ackerly et al., 2006), some combine the two approaches (Fig. 3, Evans et al., 2009;  
107 Smith and Donoghue, 2010), and others represent the niche with ordination techniques  
108 (principal component analysis, outlying mean index: Eaton et al., 2008; Boucher et al., 2012;  
109 Bystriakova et al., 2011). Here we define the optimal climate niche representation for the most  
110 common circumstance, where data derive from occurrence data and the hypothesis to be  
111 tested is specific to that region. In this case, niches based on **raw** data consist only of climate  
112 values extracted at species locations: generally the mean of those values is representing the  
113 niche (e.g. mean annual temperature, total annual precipitation). Climate niche models, a  
114 subset of species distribution models, are the most frequently used approach to represent the  
115 niche (Franklin and Miller, 2009; Peterson et al., 2011). Algorithms relate a species’

116 geographical locations to climate characteristics in order to describe its environmental niche  
117 (Guisan and Zimmermann, 2000; Kozak et al., 2008, a review of prediction ability of numerous  
118 modeling algorithms is provided by Elith et al. 2006). Modeling the niche to get insights of  
119 the functional relationship between a species and its environment is statistically preferable to  
120 the use of raw data (Peterson et al., 2011), because it accounts for the fact that species  
121 occurrences in an area might be determined by habitat availability and is not only a function  
122 of species preferences. For instance, a higher abundance in valleys compared to mountain tops  
123 could be due to a higher availability of valleys in that area, despite species' higher preference  
124 for mountains (see Fig. 3 c,d and examples below).

## 125 **Niche statistics**

126 The niche is a multidimensional entity and as such difficult to analyze phylogenetically as a  
127 whole. In general, it is decomposed into its marginal components (e.g. annual precipitation),  
128 each of which is examined separately along the phylogenetic tree. Most if not all variables  
129 describing the climate niche are continuous and the statistic most commonly chosen to  
130 represent them is the mean (e.g. mean annual precipitation). As some authors acknowledged,  
131 the mean may or may not be the most informative descriptor of the niche (see Fig. 3d,  
132 Graham et al., 2004). Different solutions have been proposed, particularly among studies  
133 where ancestral climate niche was reconstructed along the phylogeny. Graham et al. (2004)  
134 and Hardy and Linder (2005) proposed to consider the upper and lower niche limits  
135 separately, in order to infer the whole range of conditions of the ancestral niche, the so called  
136 “MaxMin” coding, which was used in a number of later studies (Yesson and Culham, 2006a,b;  
137 Lo Presti and Oberprieler, 2009; Lawing and Polly, 2011; Töpel et al., 2012). Instead of using  
138 maximum and minimum, which could be outliers, Vieites et al. (2009) proposed to consider  
139 95% confidence values. In any case, mean, minimum or maximum temperature still do not  
140 fully describe the distribution of species climatic tolerances. To tackle this issue Evans et al.  
141 (2009) proposed the “predicted niche occupancy” (PNO) profiles: histograms obtained by  
142 combining response curves from niche models with climate layers of actual species distribution  
143 in geographic space. With this approach, each climate variable is represented by a histogram,  
144 which is especially appropriate for species whose niche variables are multimodal or, more  
145 generally, do not approximate a normal distribution. Working with histograms (or rather,  
146 empirical densities) requires sampling from the distribution of values and thus repeating the

147 same analysis for each sampled value.

148 Analyzing the whole distribution of preferences is certainly more desirable than using single  
149 values. It would, however, be more appropriate to consider response curves obtained from  
150 niche models in parameter space, rather than combining them with geographic space. This  
151 avoids spurious results arising when large areas with low suitability are present in geographic  
152 space: the total sum of suitabilities (as used in Evans et al., 2009) could still be higher for  
153 those suboptimal conditions, only because of their high frequency in geographic space. This is  
154 illustrated in Fig. 3c, where a great portion of sites with the temperature of 9-10°C are not  
155 occupied by the species, therefore the probability of species occurrence at that temperature is  
156 relatively low (see Fig. 3d), but the sum of those probabilities in space will be high because  
157 there are many sites with that temperature. On the other hand, a temperature of 12-13°C is  
158 highly suitable (probability of 0.8), but there are so few sites with these conditions that the  
159 sum of suitabilities is low, despite the species' high preference for those sites. The statistical  
160 model would pick it up and discriminate between use and availability (the maximum in  
161 Fig. 3d), while the histogram of suitability in geographic space (PNO) will be biased towards  
162 common environmental conditions. Therefore, model output allows an unbiased representation  
163 of preferences, irrespective of geographic availability (Hurlbert, 1978; Manly et al., 1993;  
164 Matthiopoulos et al., 2011). This is relevant also when considering large-scale climate change  
165 and the existence of no-analog climates in different time periods - climate conditions that  
166 cover large areas today might have been very restricted at a different time, and vice versa.

167 In principle, the same resampling scheme can be used for multivariate distributions (as in  
168 Boucher et al., 2012), obviating the need to study each climate variable separately. However,  
169 given the no-analog conditions, the problem of assuming the same correlation structure  
170 between variables for different time periods arises again, an issue still waiting to be solved.

### 171 **Ecological variability**

172 Species are often polymorphic; populations of the same species may live, for example, on  
173 different types of soil, or along a wide gradient of temperature (Pearman et al., 2010). The  
174 approach described above, where species' climatic preferences are expressed with empirical  
175 densities, automatically takes into account the ecological variability within species by  
176 resampling from climatic values based on species' preferences. Theoretically the same  
177 approach could be employed for categorical variables, with preferences determining the  
178 probability of drawing from each character state (e.g. in case of higher species' preference for

179 soil-type A compared to B). This way ecological variability can be taken into account in any  
180 comparative analysis. Another method to accommodate polymorphism in discrete characters  
181 is through the quantitative genetic threshold model (Felsenstein, 2005), which models a  
182 discrete character as a continuous trait and is described in more detail in Box 1. See also  
183 Hardy and Linder (2005) and Hardy (2006) for additional methods and discussion on this  
184 topic.

## 185 Evolutionary analyses

186 How did the niche evolve among different species? Under which processes? What were the  
187 drivers? Are niches conserved or labile? What was the ancestral niche like? These are some of  
188 the most intriguing questions in comparative studies about climatic niches. We next describe  
189 the available methods to tackle some of them: we discuss the utility of phylogenetic  
190 conservatism tests, describe the most common evolutionary models, explain the procedure to  
191 infer the ancestral climatic niche and end with a summary and recommendations of best  
192 approaches.

193 As the name suggests, phylogenetic tree is the backbone of phylogenetic comparative  
194 studies. A detailed description on building a phylogeny is beyond the scope of this review, and  
195 we refer the interested readers to Holder et al. (2003); Bininda-Emonds (2004) and Roquet  
196 et al. (2012). At the coarsest level, a distinction can be drawn between phylograms (trees with  
197 branch lengths proportional to molecular distance), and chronograms (or ultrametric trees,  
198 with branch lengths proportional to time). Unless the aim of the study specifically requires  
199 the use of a phylogram, the general consensus is to use ultrametric trees because niche  
200 evolution is assumed to be proportional to time. Although sophisticated methods are  
201 continually reducing uncertainty, phylogenies still remain only hypotheses of how species  
202 evolved (Webb et al., 2002). Alternative trees often have almost the same support, which is  
203 problematic because for instance, niche reconstruction on different trees may produce different  
204 results. Therefore the best way to incorporate phylogenetic uncertainty is to carry out the  
205 analyses on a sample of plausible phylogenetic trees instead of using the single best phylogeny.

### 206 **Phylogenetic niche conservatism**

207 Phylogenetic niche conservatism (PNC) is the tendency of species to retain their ancestral  
208 niches through time (Boucher et al., 2014). The most common way to assess the PNC is by



209 measuring the phylogenetic signal: a measure indicating whether a trait evolves according to  
210 the null expectation of neutral drift model. There is still disagreement and it remains a  
211 debated topic at which similarity level phylogenetic signal can be interpreted as phylogenetic  
212 niche conservatism (Losos, 2008a; Wiens et al., 2010).

213 Here we want to highlight how testing for PNC by measuring phylogenetic signal can be  
214 potentially misleading and special caution is needed when interpreting the results. For  
215 instance, no phylogenetic signal is a pattern where species niches appear to be independent  
216 from phylogenetic relationship among them (Losos, 2011). This is usually interpreted as no  
217 niche conservatism, as it can arise when the niche evolved more than expected from random  
218 evolution. Niche diverged to such an extent that the similarity among closely related species is  
219 lost (Fig. 1c). Another cause leading to the same pattern is convergence, when species  
220 belonging to separate clades adapt to the same types of environment, and therefore the  
221 pattern of niche values distribution among clades is similar (Fig. 1c, Kraft et al., 2007).  
222 Again, this is seen as no niche conservatism. But a highly problematic and less obvious cause  
223 of observing no phylogenetic signal is *perfect* conservatism: if the evolution is extremely  
224 conserved, all species will have the same or very similar niches, and no phylogenetic signal can  
225 be detected (Fig. 1d, Revell et al., 2008; Kozak and Wiens, 2010b). This occurs under  
226 strongly stabilizing selection, where all species evolve towards the same optimum value (Revell  
227 et al., 2008; Kozak and Wiens, 2010b), or when strong biological constraints bound the niche  
228 values to a narrow interval (Revell et al., 2008; Losos, 2011). Hence no signal could indicate  
229 either divergent evolution, strong stabilizing selection with one optimum (i.e. stasis), or  
230 bounded evolution. Therefore, the same pattern can be caused by completely different  
231 processes, which cannot be distinguished among each other by measuring the level of  
232 phylogenetic signal alone. To identify whether the niche evolved under, e.g., directional  
233 selection or genetic drift, the recommended approach is to fit different evolutionary models to  
234 data, rather than measuring the phylogenetic signal (Revell et al., 2008; Cooper et al., 2010).

235 Furthermore, the detection of a phylogenetic signal depends on the size of the phylogenetic  
236 tree and the section analyzed (Fig. 1e). It is extremely important to interpret the patterns  
237 only according to the climatic/temporal boundaries within which they were identified; niche  
238 lability in a strictly tropical species does not preclude PNC at larger scales (Losos, 2008b;  
239 Wiens, 2008).

240 To summarize: (a) phylogenetic signal and niche conservatism are patterns which do not

241 necessarily reveal the underlying processes (Losos, 2011; Crisp and Cook, 2012); (b)  
242 completely different processes can lead to the same pattern (see Revell et al., 2008); (c) the  
243 detection of patterns is context-dependent (Fig. 1e).

244 Therefore, a better approach to assess niche conservatism among different clades is to test  
245 for mechanisms and evolutionary processes.

### 246 **Models of evolution**

247 Evolutionary models describe and approximate the natural processes responsible for trait  
248 evolution (Fig. 4). Fitting various models to the data permits to test hypotheses about the  
249 processes driving evolution of particular trait (e.g. the climatic niche). Before actually fitting  
250 models to the data, it is advisable to first identify plausible evolutionary processes based on  
251 prior biological knowledge, and afterwards proceed to fit only the corresponding models  
252 (Fig. 5). By fitting all the models without distinction one runs the risk of selecting a model  
253 with good statistical fit, but biologically improbable premises (as demonstrated in Wiens  
254 et al., 2007). The model with best fit is chosen in most cases through likelihood ratio tests  
255 (LRT, Johnson and Omland, 2004). Model selection criteria such as Akaike information  
256 criterion (AIC, Akaike, 1973) or Schwarz criterion (BIC, Schwarz, 1978) provide several  
257 advantages; they can compare multiple models simultaneously, rank them, give relative  
258 supports and are not influenced by the hierarchical order in which the models are compared  
259 (Burnham and Anderson, 2002; Johnson and Omland, 2004; Posada and Buckley, 2004).

260 Nonetheless, recent criticism about information theoretic approaches cast a doubt on their  
261 ability to discern the correct model. As Boettiger et al. (2012) and Slater and Pennell (2013)  
262 argue, in comparative studies *predictive approaches* are more robust and powerful means for  
263 model selection. While information theoretic approaches select the model which maximizes  
264 the posterior probability of the observed values, predictive approaches prefer the model which  
265 best predicts the observed values through simulation (Slater and Pennell, 2013). In this  
266 approach the models are first fitted and parameters for each model of evolution are estimated,  
267 and subsequently used to simulate new data. The models are then evaluated based on how  
268 closely they predicted the observed data. This procedure is available in the R-package  
269 “geiger” (Harmon et al., 2008), so far to test for early burst, Brownian motion and rate shift  
270 models. Package “pmc” (Boettiger et al., 2012) allows a simulation based method to choose  
271 between models fitted in “geiger”, “ape” (Paradis et al., 2004) and “ouch” (King and Butler,  
272 2009). Given that complex models have a higher number of parameters, the phylogenies have

## 273 **Evolutionary models for continuous characters**

274 The simplest evolutionary model is the **Brownian motion model** (BM, Cavalli-Sforza and  
275 Edwards, 1967; Felsenstein, 1985, 1988). Under this model the traits are evolving randomly in  
276 any direction from the mean at each instant of time, with a net change of zero. The  
277 probability of character change is thus proportional to branch length, and the correlation  
278 among trait values at the tips of the tree decreases linearly with increasing phylogenetic  
279 distance between species (i.e. the more closely related the species, the more similar their traits  
280 are, Hansen and Martins, 1996). Exactly the same correlation structure is also expected when  
281 traits evolve under some other processes, such as directional or stabilizing selection with  
282 fluctuating optimum or punctuated change (periods of stasis alternated by abrupt changes,  
283 Hansen and Martins, 1996; O'Meara et al., 2006; Thomas and Freckleton, 2011). The  
284 assumptions of BM are violated if the values of a trait are near their biological limits and  
285 therefore cannot decrease or increase independently of the current value, or if the trait is  
286 under stabilizing selection (O'Meara et al., 2006). In those cases trait evolution is better  
287 described by the **Ornstein-Uhlenbeck model** (OU, Hansen, 1997; Butler and King, 2004;  
303 288 Estes and Arnold, 2007), an extension of BM which has an additional term describing the  
289 “pull” towards an optimum value (known as mean-reversion rate in financial mathematics).  
290 When the value of this constraint equals zero, the model is equal to BM. On the other hand,  
291 the higher the pull towards an optimal value is, the lower the correlation among closely related  
292 species will be, as all species evolve towards the same optimum.

293 Another process of great evolutionary importance is “adaptive radiation”, which traces back  
294 to Simpson (1944). According to this process, species traits initially evolve rapidly and then  
295 slow down as the niche space becomes filled, which is basically opposing the idea of gradual  
296 evolution as described by simple BM (Harmon et al., 2003, 2010; Slater et al., 2010). It is  
297 modeled as BM with decelerating rates of evolution through time, a model commonly known  
298 as **early-burst (EB)** or **ACDC** (accelerating versus decelerating rates of character evolution,  
299 Blomberg et al., 2003), which can also be tested with **Pagel's  $\delta$**  (Pagel, 1997; Pagel et al.,  
300 1999). Another way of detecting the pattern of decelerating evolutionary rates is to infer rate  
301 shifts through phylogeny, as described in Eastman et al. (2011), or by calculating the  
302 morphological disparity index (MDI, Harmon et al., 2003).

304 **Box 1: continued**

305 A further option is to perform the node height test: EB occurs when the standardized  
306 independent contrasts of trait values are higher deeper in the tree than among more recent  
307 nodes in the phylogeny (Freckleton and Harvey, 2006). Although the model of adaptive  
308 radiation is generally well supported in paleontology, it has not been often observed in  
309 comparative studies (Harmon et al., 2010). Slater and Pennell (2013) argue the inability of  
310 detecting EB may be because of lack of power of currently employed methods, rather than the  
311 absence of such pattern in nature. Several other models describing adaptive radiation exist  
312 which assume a decrease of evolutionary rates as a function of the number of competing  
313 lineages (Mahler et al., 2010), or are refinements of Price's **niche-filling** models (Price, 1997;  
314 Harvey and Rambaut, 2000; Freckleton and Harvey, 2006). Adaptive radiation can also be  
315 fitted with a stabilizing selection model where different clades in the tree evolve towards  
316 different optima (multiple-optimum OU model Butler and King, 2004).

317 Similarly, to investigate the tempo of evolution – whether traits evolved rapidly immediately  
318 after speciation events followed by a long period of stasis – it is necessary to fit

319 **punctuational** or **speciational** models of evolution, where the evolutionary change is a  
320 function of speciation events and is independent of branch lengths (Gould and Eldredge, 1972;  
321 Huey and Bennett, 1987; Pagel, 1997; Pagel et al., 1999; Pagel, 2002). This type of evolution  
322 can also be detected by testing for a cladogenetic component of trait evolution with Bayesian  
323 MCMC test (Bokma, 2008). Models can also assign different rates of trait evolution to  
324 different parts of a tree (O'Meara et al., 2006; Thomas et al., 2006; Eastman et al., 2011;  
325 Venditti et al., 2011; Beaulieu et al., 2012; Revell, 2012). It is possible to identify the location  
326 of a rate shift in the phylogeny with R-packages “phytools” (evol.rate.mcmc Revell, 2012), or  
327 “geiger” (rjmcmbm).

328 Different evolutionary models for continuously varying trait can be fitted with R-package  
329 “geiger” (Harmon et al., 2008), “ouch” (Butler and King, 2004), ‘ouwie” (Beaulieu et al.,  
330 2012), whereas Mahler et al. (2010) model can be fitted by fitDiversityModel in phytools.

331 **Discrete characters**

332 Statistical models describing the evolution of discrete characters are based on continuous-time  
333 Markov process, equivalent to the Brownian motion model for continuous characters (Schluter  
334 et al., 1997; Cunningham et al., 1998; Pagel et al., 1999; Ronquist, 2004). The earliest and  
335 simplest such model is the Jukes-Cantor model proposed for nucleotide substitution with  
336 equal transition rates (Jukes and Cantor, 1969; Galtier et al., 2005).

338 **Box 1: continued**

339 Kimura (1980) extended it to a two-rate model to allow the transition rates between  
340 nucleotides to differ. Today this family of models are known as Mk models, Markov models  
341 which can assume  $k$  states. (Lewis, 2001). The central feature of the model is the rate matrix,  
342 which contains the instantaneous transition rates between different character states (Pagel,  
343 1997; Pagel et al., 1999). With a 3-states trait, this transition matrix is a  $3 \times 3$  matrix with  
344 forward and backward transition rates represented on the off-diagonals (Revell, 2014). The  
345 model can assume different rates among characters (the rate  $A \rightarrow B$  may differ from  $B \rightarrow C$ ),  
346 and the direction of change (the forward transition  $A \rightarrow B$  may differ from the backward  
347 direction  $B \rightarrow A$ ). Until recently, the transition rates were fixed and applied to the entire  
348 phylogeny, without the possibility, for instance, to assume a different rate of  $A \rightarrow B$  transition  
349 on different parts of the tree. This is now possible with the R package “corHHM”, which  
350 handles the different rate classes as hidden character states (e.g. fast and slow; Beaulieu et al.,  
351 2013). Another innovative way to model the evolution of discrete characters is through the  
352 “threshold” model, first described by (Wright, 1934), in which the discrete trait is practically  
353 transformed to a continuous character, an unobserved trait called “liability” with fixed  
370 354 thresholds (Felsenstein, 2012; Revell, 2014). For example, a trait with two states (A, B) can  
355 be represented by a continuous scale liability axis with an arbitrary threshold (e.g. at 0), so  
356 that when the liability assumes negative values, the trait is in state A, otherwise in state B.  
357 The threshold model is biologically reasonable because it models a discrete character as a  
358 continuous trait where the probability of the character to change states decreases with time:  
359 the longer the time after the character crossed the threshold and moved to another state, the  
360 less probable it is the return to previous state, in contrast to Mk model, in which the amount  
361 of time at a certain state does not influence the probability of change (Felsenstein, 2002). The  
362 threshold model is implemented in R package “phytools” (Revell, 2012) and permits ancestral  
363 reconstruction of discrete characters under BM and OU models of evolution. Several other R  
364 packages are available for reconstruction of discrete traits under both joint and marginal  
365 methods, allowing multistate characters and different transition rates: diversitree (FitzJohn,  
366 2012), geiger (Harmon et al., 2008), ape (Paradis et al., 2004), as well as other software such  
367 as MESQUITE, BayesTraits and SIMMAP (Bollback, 2006). J. Felsenstein’s webpage  
368 (<http://evolution.genetics.washington.edu/phylip/software.html>) provides an overview of  
369 other available phylogeny software.

371 to be large enough to allow a reasonable inference of the evolutionary model (Boettiger et al.,  
372 2012). Thanks to the increasing availability of molecular data, phylogenetic trees are growing  
373 to include many thousand species (Bininda-Emonds et al., 2007; Smith and Donoghue, 2008;  
374 Thuiller et al., 2011; Jetz et al., 2012). With such a variety of life forms it becomes reasonable,  
375 even necessary, to assume and test much more complex models of evolution than a simple  
376 Brownian motion.

377 **Integrating fossil records** Incorporating known ancestral values dramatically improves the  
378 inference of the evolutionary model, in particular by allowing the detection of directional  
379 evolutionary trends, which are virtually unobservable with extant taxa only (Oakley and  
380 Cunningham, 2000; Finarelli and Flynn, 2006; Albert et al., 2009; Slater et al., 2012).  
381 Substantial improvements were shown for model detection for all tested models (BM, AC/DC  
382 and OU: Slater et al., 2012). Integrating prior information by directly assigning values to  
383 specific ancestral nodes in the phylogeny is now possible and technically straightforward (e.g.  
384 in R-packages “phytools” and “geiger”; Slater et al., 2012). Constraining values from  
385 wandering too far from the optimum value can be achieved by simulating “bounded evolution”  
386 by varying the “pull” parameter of the OU model, which in turn determines the width around  
387 the optimum, or by setting absolute limits (as proposed by Revell, 2007; Revell et al., 2008).  
388 Given that the interpretation of results in comparative methods largely depend on the model  
389 of evolution, it will be important to integrate all available prior knowledge from paleosciences,  
390 continue developing realistic evolutionary models, as well as establishing reliable techniques to  
391 choose among them.

## 392 **Ancestral niche reconstruction**

393 Rapidly developing statistical reconstruction methods permit the estimation of ancestral  
394 trait values based on its present-day value, the phylogenetic relationship among species and an  
395 evolutionary model. Therefore the inference of the best evolutionary model should be an  
396 integral part of the reconstruction procedure. If a model is not specified, most reconstruction  
397 methods will follow a BM model by default, and their output will be identical or very similar  
398 (see Table 2).

399 As in model-fitting, the methods for continuous and discrete traits are slightly different.  
400 Climate variables are most commonly expressed on a **continuous** scale and ancestral climate  
401 niches can be reconstructed following the methods for continuous characters. Squared-change

402 parsimony (or weighted squared-change parsimony) was initially the most widely used  
403 method. The optimal values for ancestral characters are found when the sum of their squared  
404 changes over the whole phylogenetic tree reaches the minimum value (Maddison, 1991;  
405 Garland et al., 1997). Weighted squared-change parsimony takes into account branch lengths  
406 (i.e. evolutionary time), so that the resulting reconstruction corresponds to BM evolution  
407 (Maddison, 1991; Webster and Purvis, 2002). Another widely used method was Felsenstein's  
408 (1985) independent contrasts (IC). Although weighted squared-change parsimony and IC both  
409 implicitly assume a BM model of evolution, those two methods will yield slightly different  
410 reconstructed values for all nodes except the basal, because independent contrasts use "local"  
411 optimization (only daughter nodes are considered to infer the value of the ancestor), as  
412 opposed to "global" optimization used in squared-change parsimony (Maddison, 1991;  
413 Garland et al., 1997; Webster and Purvis, 2002). Nowadays more commonly used methods are  
414 maximum likelihood (ML) (Schluter et al., 1997; Cunningham et al., 1998), generalized least  
415 squares (GLS) (Grafen, 1989; Martins and Hansen, 1997; Pagel et al., 1999; Martins, 1999)  
416 and Bayesian approaches (Pagel et al., 2004). Ancestral traits, and hence also climate niches  
417 can be estimated using R-packages "ape", "phytools" and "phyloclim" (Heibl et al., 2013) and  
418 other software as MESQUITE (Maddison and Maddison, 2001), BayesTraits (Pagel and  
419 Meade, 2007) or COMPARE (Martins, 2004). Table 3. summarizes the approaches used in  
420 climatic niche reconstruction studies, indicating methodological improvements over time.

421 One could represent climate preferences as **discrete** characters (e.g. by categorising  
422 temperature values into "arid" and "mesic" conditions). Performing this categorization *after*  
423 the reconstruction of continuous climate variables allows more precision and avoids spurious  
424 results due to arbitrarily chosen thresholds. Maximum parsimony reconstructs the ancestral  
425 values by minimizing the number of changes needed to reach the observed present-day values  
426 (Pagel et al., 1999; Pedersen et al., 2007). Maximum likelihood and Bayesian methods are  
427 broadly grouped into "joint" or "global" and "marginal" or "local" reconstructions. Joint  
428 reconstruction finds the states which jointly maximize the likelihood over the whole phylogeny.  
429 In contrast, marginal reconstruction singles out the state with the highest likelihood at each  
430 node separately, which can be useful to test a specific hypothesis at a certain node in the tree  
431 (Pagel, 1999). Models which describe the evolution of discrete characters are based on the  
432 Markov-transition process of the probability of the character (see Box 1, Pagel et al., 1999).

433 Reconstruction procedures take into account evolutionary models by transforming the



434 branch lengths, the path separating species pairs from their common ancestor in the  
435 phylogenetic tree. For instance, according to early burst model, evolution is faster closer to  
436 the root of the tree, therefore after transformation those branches will be longer compared to  
437 the branches closer to the tips where the rate of evolution is slowing down. Reconstructing the  
438 values according to a specific model of evolution in R can be done in two steps: first, it is  
439 necessary to transform the phylogenetic tree according to the previously tested best fitting  
440 model (e.g. `rescale` function in “`geiger`”), and afterwards this rescaled tree can be used for  
441 ML-based ancestral niche reconstruction under the default BM model of evolution (e.g. `ace`  
442 function in “`ape`”). The obtained ancestral values correspond to values evolved according to  
443 the evolutionary model used to transform the tree. Accordingly, weighted squared change  
444 parsimony or independent contrasts can fit different models of evolution in a computationally  
445 efficient way, by employing appropriate transformations of the phylogeny (see Table 1).

446       Regardless of the character type or method of choice, estimating trait history on a sample  
447 of possible phylogenetic trees instead of using only the single best tree allows to incorporate  
448 phylogenetic uncertainty in the analysis. Reconstructed estimates of all trees are then  
449 averaged and their distribution provides uncertainty estimates. This procedure is not limited  
450 to Bayesian analysis, but can be applied to any ancestral reconstruction method (Donoghue  
451 and Ackerly, 1996; Martins and Hansen, 1997; de Villemerueil et al., 2012).

452 **Visualizing and validating the ancestral range and climatic niche** If the aim of niche  
453 reconstruction was exploring the unfolding of evolutionary changes through time, we may  
454 want to visualize the ancestral climatic niche in an abstract multidimensional climate space  
455 (e.g. Veloz et al., 2012). On the other hand, to visualize the historical distribution and  
456 appreciate the extent of range shift through time, ancestral niche is often projected to a  
457 geographic map along with the current climatic niche (e.g. Yesson and Culham, 2006a; Lawing  
458 and Polly, 2011; Töpel et al., 2012). This may be problematic because environmental variables  
459 today are most likely correlated differently among each other than they were in the past  
460 (Boucher et al., 2012), given that non-analog climate conditions were already present at  
461 different time steps even on a short time scale, such as in the Quaternary (Jackson and  
462 Overpeck, 2000; Williams and Jackson, 2007). Therefore, projecting the ancestral niche to  
463 today’s world and vice-versa will not accurately represent the ancestral range, as parts of the  
464 range may be missing while some other areas might be wrongly assigned. It practically shows



465 where the ancestor would live today, but not necessarily where it actually lived in the past.  
466 The ideal solution would be to project to paleoclimate maps, but because they become less  
467 reliable the further one goes back in time, it is difficult to infer the correct ancestral range  
468 solely with SDMs, without fossil records. Fossil records are scarce for most species and are  
469 often biased with respect to climate, topography, species size and abundance, yielding fewer  
470 traces of rare and small-sized animal species especially in wet tropical climates (Kidwell and  
471 Flessa, 1995). Still, whenever available they are a valuable indicator of a species' past  
472 distribution as they are generally buried within the species' range so spatial displacements  
473 between past and present are likely due to a range shift of species (Kidwell and Flessa, 1995).  
474 Fossil records of species occurrences can prove that species were present in the study area at  
475 the specific time (Vieites et al., 2009), and/or in the predicted ancestral range.

476 Known ancestral climatic values from paleodata add valuable information and should either  
477 be used to aid a better approximation of evolutionary models by constraining specific nodes to  
478 known values, as previously seen, or be employed for validating the reconstructed niche values.  
479 Validation may be more important when current data already yield a well-constrained model.  
480 In contrast, poorly defined models may profit from integrating paleoclimate data into the  
481 estimation process.

## 482 Summary and recommendations

483 Here we summarize and propose tentative guidelines for optimal use of species occurrence and  
484 climatic data in phylogenetic comparative studies.

### 485 **Niche representation**

- 486 • When present-day climate niches are inferred from spatial occurrences, niche models are  
487 a better choice than raw data.
- 488 • Each climatic variable should ideally be expressed by species preference for the full range  
489 of values (i.e. empirical densities), instead of being summarized by the mean or other  
490 point estimates (e.g. mean temperature).

### 491 **Ancestral niche reconstruction**

- 492 • Before reconstructing the niche, a best-fitting evolutionary model should be estimated  
493 for each climatic variable.

- 494 • Known paleoclimate data can either be used to improve the evolutionary model
- 495 inference or to validate the reconstructed values.
- 496 • Evolutionary changes are best visualised in an abstract climatic space.
- 497 • Ancestral species range should be projected to a paleoclimate map.

## 498 Concluding remarks

499 Analysing the evolution of climatic niches integrates species distribution modeling,  
500 phylogenies, evolutionary models as well as elements of paleosciences. Such a complex research  
501 question requires careful consideration of each component to minimize potential bias and  
502 information loss. We primarily focused and discussed the most appropriate methods to  
503 represent the climatic niche through species distribution modeling and outlined the procedure  
504 for ancestral niche reconstruction. This research field has a lot to gain from improvements in  
505 other areas, particularly from developing new evolutionary models, which would better  
506 approximate processes on macroevolutionary scale. Available paleodata has the potential to  
507 greatly improve the detection of evolutionary models (Slater et al., 2012), and we expect the  
508 future efforts in this interdisciplinary field to focus especially on a better integration of  
509 phylogenetic, paleontological and climatic data.

510 **Acknowledgments** We would like to thank Jan Schnitzler and Marten Winter for providing  
511 valuable comments that greatly improved the manuscript. This research was supported by the  
512 German Research Foundation, DFG (DO 786/5-1). The authors declare no conflict of interest.

## 513 References

- 514 Ackerly, D. D., Schilck, D. W. and Webb, C. O. 2006. Niche evolution and adaptive radiation:  
515 testing the order of trait divergence. – *Ecology* 87: S50–S61.
- 516 Afkhami, M. E., McIntyre, P. J. and Strauss, S. Y. 2014. Mutualist-mediated effects on  
517 species' range limits across large geographic scales. – *Ecology letters* 17(10): 1265–1273.
- 518 Ahmadzadeh, F., Flecks, M., Carretero, M. A., Böhme, W., Ilgaz, C., Engler, J. O.,  
519 James Harris, D., Üzüüm, N. and Rödder, D. 2013. Rapid lizard radiation lacking niche  
520 conservatism: ecological diversification within a complex landscape. – *Journal of*  
521 *Biogeography* 40(9): 1807–1818.
- 522 Akaike, H. 1973. Information theory and an extension of the maximum likelihood principle. –  
523 In: *Second International Symposium on Information Theory*. Springer Verlag, vol. 1, pp.  
524 267–281.
- 525 Albert, J. S., Johnson, D. M. and Knouft, J. H. 2009. Fossils provide better estimates of  
526 ancestral body size than do extant taxa in fishes. – *Acta Zoologica* 90(s1): 357–384.
- 527 Beaulieu, J. M., Jhwueng, D.-C., Boettiger, C. and O'Meara, B. C. 2012. Modeling stabilizing  
528 selection: expanding the Ornstein–Uhlenbeck model of adaptive evolution. – *Evolution*  
529 66(8): 2369–2383.
- 530 Beaulieu, J. M., O'Meara, B. C. and Donoghue, M. J. 2013. Identifying hidden rate changes in  
531 the evolution of a binary morphological character: the evolution of plant habit in  
532 campanulid angiosperms. – *Systematic Biology* 62(5): 725–737.
- 533 Bininda-Emonds, O., Cardillo, M., Jones, K., MacPhee, R., Beck, R., Grenyer, R., Price, S.,  
534 Vos, R., Gittleman, J. and Purvis, A. 2007. The delayed rise of present-day mammals. –  
535 *Nature* 446(7135): 507–512.
- 536 Bininda-Emonds, O. R. 2004. *Phylogenetic supertrees: combining information to reveal the*  
537 *tree of life*. – vol. 4. Springer, Berlin.
- 538 Blomberg, S., Garland Jr, T. and Ives, A. 2003. Testing for phylogenetic signal in comparative  
539 data: behavioral traits are more labile. – *Evolution* 57(4): 717–745.

- 540 Boettiger, C., Coop, G. and Ralph, P. 2012. Is your phylogeny informative? Measuring the  
541 power of comparative methods. – *Evolution* 66(7): 2240–2251.
- 542 Bokma, F. 2008. Detection of “punctuated equilibrium” by Bayesian estimation of speciation  
543 and extinction rates, ancestral character states, and rates of anagenetic and cladogenetic  
544 evolution on a molecular phylogeny. – *Evolution* 62(11): 2718–2726.
- 545 Bollback, J. P. 2006. SIMMAP: stochastic character mapping of discrete traits on  
546 phylogenies. – *BMC Bioinformatics* 7(1): 88.
- 547 Boucher, F., Thuiller, W., Roquet, C., Douzet, R., Aubert, S., Alvarez, N. and Lavergne, S.  
548 2012. Reconstructing the origins of high-alpine niches and cushion life form in the genus  
549 *Androsace* S.L. (Primulaceae). – *Evolution* 66(4): 1255–1268.
- 550 Boucher, F. C., Thuiller, W., Davies, T. J. and Lavergne, S. 2014. Neutral biogeography and  
551 the evolution of climatic niches. – *The American Naturalist* 183(5): 573.
- 552 Bruno, J. F., Stachowicz, J. J. and Bertness, M. D. 2003. Inclusion of facilitation into  
553 ecological theory. – *Trends in Ecology & Evolution* 18(3): 119–125.
- 554 Burnham, K. P. and Anderson, D. R. 2002. Model selection and multi-model inference: a  
555 practical information-theoretic approach. – Springer, Berlin.
- 556 Butler, M. and King, A. 2004. Phylogenetic comparative analysis: a modeling approach for  
557 adaptive evolution. – *The American Naturalist* 164(6): 683–695.
- 558 Bystriakova, N., Schneider, H. and Coomes, D. 2011. Evolution of the climatic niche in scaly  
559 tree ferns (Cyatheaceae, Polypodiopsida). – *Botanical Journal of the Linnean Society*  
560 165(1): 1–19.
- 561 Cavalli-Sforza, L. L. and Edwards, A. W. 1967. Phylogenetic analysis. Models and estimation  
562 procedures. – *American Journal of Human Genetics* 19(3 Pt 1): 233.
- 563 Cooper, N., Jetz, W. and Freckleton, R. 2010. Phylogenetic comparative approaches for  
564 studying niche conservatism. – *Journal of Evolutionary Biology* 23(12): 2529–2539.
- 565 Crisp, M., Arroyo, M., Cook, L., Gandolfo, M., Jordan, G., McGlone, M., Weston, P.,  
566 Westoby, M., Wilf, P. and Linder, H. 2009. Phylogenetic biome conservatism on a global  
567 scale. – *Nature* 458(7239): 754–756.

- 568 Crisp, M. D. and Cook, L. G. 2012. Phylogenetic niche conservatism: what are the underlying  
569 evolutionary and ecological causes?. – *New Phytologist* 196(3): 681–694.
- 570 Cunningham, C., Omland, K. and Oakley, T. 1998. Reconstructing ancestral character states:  
571 a critical reappraisal. – *Trends in Ecology & Evolution* 13(9): 361–366.
- 572 Donoghue, M. J. and Ackerly, D. D. 1996. Phylogenetic uncertainties and sensitivity analyses  
573 in comparative biology. – *Philosophical Transactions of the Royal Society of London. Series*  
574 *B* 351(1345): 1241–1249.
- 575 Dormann, C. F., Gruber, B., Winter, M. and Herrmann, D. 2010. Evolution of climate niches  
576 in European mammals?. – *Biology Letters* 6(2): 229–232.
- 577 Eastman, J. M., Alfaro, M. E., Joyce, P., Hipp, A. L. and Harmon, L. J. 2011. A novel  
578 comparative method for identifying shifts in the rate of character evolution on trees. –  
579 *Evolution* 65(12): 3578–3589.
- 580 Eaton, M., Soberón, J. and Peterson, A. 2008. Phylogenetic perspective on ecological niche  
581 evolution in American blackbirds (family Icteridae). – *Biological Journal of the Linnean*  
582 *Society* 94(4): 869–878.
- 583 Edwards, E. and Donoghue, M. 2006. *Pereskia* and the origin of the cactus life-form. – *The*  
584 *American Naturalist* 167(6): 777–793.
- 585 Edwards, E. and Smith, S. 2010. Phylogenetic analyses reveal the shady history of C4  
586 grasses. – *Proceedings of the National Academy of Sciences, USA* 107(6): 2532–2537.
- 587 Elith, J., Graham\*, C., Anderson, R., Dudik, M., Ferrier, S., Guisan, A., Hijmans, R.,  
588 Huettmann, F., Leathwick, J., Lehmann, A. et al. 2006. Novel methods improve prediction  
589 of species' distributions from occurrence data. – *Ecography* 29(2): 129–151.
- 590 Estes, S. and Arnold, S. J. 2007. Resolving the paradox of stasis: models with stabilizing  
591 selection explain evolutionary divergence on all timescales. – *The American Naturalist*  
592 169(2): 227–244.
- 593 Evans, M., Hearn, D., Hahn, W., Spangle, J. and Venable, D. 2005. Climate and life-history  
594 evolution in evening primroses (*Oenothera*, Onagraceae): a phylogenetic comparative  
595 analysis. – *Evolution* 59(9): 1914–1927.

- 596 Evans, M., Smith, S., Flynn, R. and Donoghue, M. 2009. Climate, niche evolution, and  
597 diversification of the “bird-cage” evening primroses (*Oenothera*, Sections *Anogra* and  
598 *Kleinia*). – *The American Naturalist* 173(2): 225–240.
- 599 Felsenstein, J. 1985. Phylogenies and the comparative method. – *American Naturalist* 125(1):  
600 1–15.
- 601 — 1988. Phylogenies and quantitative characters. – *Annual Review of Ecology and*  
602 *Systematics* 19: 445–471.
- 603 — 2002. Quantitative characters, phylogenies, and morphometrics. – In: MacLeod, N. and  
604 Forey, P. L. (eds.), *Morphology, shape and phylogeny*. Taylor and Francis, London and New  
605 York, pp. 27–44.
- 606 — 2005. Using the quantitative genetic threshold model for inferences between and within  
607 species. – *Philosophical Transactions of the Royal Society B* 360(1459): 1427–1434.
- 608 — 2012. A comparative method for both discrete and continuous characters using the  
609 threshold model. – *The American Naturalist* 179(2): 145–156.
- 610 Finarelli, J. A. and Flynn, J. J. 2006. Ancestral state reconstruction of body size in the  
611 Caniformia (Carnivora, Mammalia): the effects of incorporating data from the fossil  
612 record. – *Systematic Biology* 55(2): 301–313.
- 613 FitzJohn, R. G. 2012. Diversitree: comparative phylogenetic analyses of diversification in R. –  
614 *Methods in Ecology and Evolution* 3(6): 1084–1092.
- 615 Franklin, J. and Miller, J. 2009. *Mapping species distributions: spatial inference and*  
616 *prediction*. – vol. 338. Cambridge University Press Cambridge.
- 617 Freckleton, R. P. and Harvey, P. H. 2006. Detecting non-Brownian trait evolution in adaptive  
618 radiations. – *PLoS biology* 4(11): e373.
- 619 Galtier, N., Gascuel, O. and Jean-Marie, A. 2005. Markov models in molecular evolution. – In:  
620 Nielsen, R. (ed.), *Statistical Methods in Molecular Evolution*. Springer, New York, pp. 3–24.
- 621 Garland, T., Martin, K. and Diaz-Uriarte, R. 1997. Reconstructing ancestral trait values using  
622 squared-change parsimony: plasma osmolarity at the origin of amniotes. – In: Sumida, S.

- 623 and Martin, K. L. (eds.), *Amniote Origins: Completing the Transition to Land*. Academic  
624 Press San Diego, CA, pp. 425–501.
- 625 Gould, S. J. and Eldredge, N. 1972. Punctuated equilibria: an alternative to phyletic  
626 gradualism. – In: Schopf, T. J. (ed.), *Models in paleobiology*. Freeman, Cooper, San  
627 Francisco, pp. 82–115.
- 628 Grafen, A. 1989. The phylogenetic regression. – *Philosophical Transactions of the Royal*  
629 *Society of London. Series B* 326: 119–157.
- 630 Graham, C., Ron, S., Santos, J., Schneider, C. and Moritz, C. 2004. Integrating phylogenetics  
631 and environmental niche models to explore speciation mechanisms in dendrobatid frogs. –  
632 *Evolution* 58(8): 1781–1793.
- 633 Guerrero, P. C., Rosas, M., Arroyo, M. T. and Wiens, J. J. 2013. Evolutionary lag times and  
634 recent origin of the biota of an ancient desert (Atacama–Sechura). – *Proceedings of the*  
635 *National Academy of Sciences* 110(28): 11469–11474.
- 636 Guisan, A. and Zimmermann, N. 2000. Predictive habitat distribution models in ecology. –  
637 *Ecological modelling* 135(2): 147–186.
- 638 Hansen, T. 1997. Stabilizing selection and the comparative analysis of adaptation. – *Evolution*  
639 51(5): 1341–1351.
- 640 Hansen, T. and Martins, E. 1996. Translating between microevolutionary process and  
641 macroevolutionary patterns: the correlation structure of interspecific data. – *Evolution* 50:  
642 1404–1417.
- 643 Hardy, C. 2006. Reconstructing ancestral ecologies: challenges and possible solutions. –  
644 *Diversity and Distributions* 12(1): 7–19.
- 645 Hardy, C. and Linder, H. 2005. Intraspecific variability and timing in ancestral ecology  
646 reconstruction: a test case from the Cape flora. – *Systematic Biology* 54(2): 299–316.
- 647 Harmon, L., Schulte II, J., Larson, A. and Losos, J. 2003. Tempo and mode of evolutionary  
648 radiation in iguanian lizards. – *Science* 301(5635): 961–964.
- 649 Harmon, L. J., Losos, J. B., Jonathan Davies, T., Gillespie, R. G., Gittleman, J. L.,  
650 Bryan Jennings, W., Kozak, K. H., McPeck, M. A., Moreno-Roark, F., Near, T. J. et al.

- 651 2010. Early bursts of body size and shape evolution are rare in comparative data. –  
652 *Evolution* 64(8): 2385–2396.
- 653 Harmon, L. J., Weir, J. T., Brock, C. D., Glor, R. E. and Challenger, W. 2008. GEIGER:  
654 investigating evolutionary radiations. – *Bioinformatics* 24(1): 129–131.
- 655 Harvey, P. H. and Rambaut, A. 2000. Comparative analyses for adaptive radiations. –  
656 *Philosophical Transactions of the Royal Society of London. Series B* 355(1403): 1599–1605.
- 657 Heibl, C., Calenge, C. and Heibl, M. C. 2013. Package ?phyloclim?. – .
- 658 Heibl, C. and Renner, S. S. 2012. Distribution models and a dated phylogeny for Chilean  
659 *Oxalis* species reveal occupation of new habitats by different lineages, not rapid adaptive  
660 radiation. – *Systematic Biology* 61(5): 823–834.
- 661 Hoffmann, M. 2005. Evolution of the realized climatic niche in the genus: *Arabidopsis*  
662 (Brassicaceae). – *Evolution* 59(7): 1425–1436.
- 663 Holder, M., Lewis, P. et al. 2003. Phylogeny estimation: traditional and Bayesian  
664 approaches. – *Nature Reviews Genetics* 4(4): 275–284.
- 665 Holstein, N. and Renner, S. 2011. A dated phylogeny and collection records reveal repeated  
666 biome shifts in the African genus *Coccinia* (Cucurbitaceae). – *BMC Evolutionary Biology*  
667 11(1): 28.
- 668 Huey, R. B. and Bennett, A. F. 1987. Phylogenetic studies of coadaptation: preferred  
669 temperatures versus optimal performance temperatures of lizards. – *Evolution* 41:  
670 1098–1115.
- 671 Hurlbert, S. 1978. The measurement of niche overlap and some relatives. – *Ecology* 59(1):  
672 67–77.
- 673 Hutchinson, G. 1957. Cold Spring Harbor Symposium on Quantitative Biology. – Concluding  
674 remarks, *Quant. Biol.* 22: 415–427.
- 675 Hutchinson, G. E. 1978. *An Introduction to Population Ecology*. – vol. 260. Yale University  
676 Press, New Haven.
- 677 Jackson, S. T. and Overpeck, J. T. 2000. Responses of plant populations and communities to  
678 environmental changes of the late Quaternary. – *Paleobiology* 26(4): 194–220.



- 679 Jakob, S. S., Heibl, C., Rödder, D. and Blattner, F. R. 2010. Population demography  
680 influences climatic niche evolution: evidence from diploid American *Hordeum* species  
681 (Poaceae). – *Molecular Ecology* 19(7): 1423–1438.
- 682 Jara-Arancio, P., Arroyo, M. T., Guerrero, P. C., Hinojosa, L. F., Arancio, G. and Méndez,  
683 M. A. 2014. Phylogenetic perspectives on biome shifts in *Leucocoryne* (Alliaceae) in relation  
684 to climatic niche evolution in western South America. – *Journal of Biogeography* 41(2):  
685 328–338.
- 686 Jetz, W., Thomas, G., Joy, J., Hartmann, K. and Mooers, A. 2012. The global diversity of  
687 birds in space and time. – *Nature* 491(7424): 444–448.
- 688 Johnson, J. and Omland, K. 2004. Model selection in ecology and evolution. – *Trends in*  
689 *Ecology & Evolution* 19(2): 101–108.
- 690 Jukes, T. H. and Cantor, C. R. 1969. Evolution of protein molecules. – In: Munro, H. N.  
691 (ed.), *Mammalian Protein Metabolism*. Academic Press, New York, pp. 21–132.
- 692 Kearney, M. and Porter, W. P. 2004. Mapping the fundamental niche: physiology, climate,  
693 and the distribution of a nocturnal lizard. – *Ecology* 85(11): 3119–3131.
- 694 Kellermann, V., Loeschcke, V., Hoffmann, A., Kristensen, T., Fløjgaard, C., David, J.,  
695 Svenning, J. and Overgaard, J. 2012. Phylogenetic constraints in key functional traits  
696 behind species' climate niches: patterns of desiccation and cold resistance across 95  
697 *Drosophila* species. – *Evolution* 66(11): 3377–3389.
- 698 Kidwell, S. M. and Flessa, K. W. 1995. The quality of the fossil record: populations, species,  
699 and communities. – *Annual Review of Ecology and Systematics* 26: 269–299.
- 700 Kimura, M. 1980. A simple method for estimating evolutionary rates of base substitutions  
701 through comparative studies of nucleotide sequences. – *Journal of Molecular Evolution*  
702 16(2): 111–120.
- 703 King, A. and Butler, M. 2009. ouch: Ornstein-Uhlenbeck models for phylogenetic comparative  
704 hypotheses (R package). – .
- 705 Koecke, A. V., Muellner-Riehl, A. N., Pennington, T. D., Schorr, G. and Schnitzler, J. 2013.  
706 Niche evolution through time and across continents: The story of Neotropical *Cedrela*  
707 (Meliaceae). – *American Journal of Botany* 100(9): 1800–1810.

- 708 Kozak, K., Graham, C. and Wiens, J. 2008. Integrating GIS-based environmental data into  
709 evolutionary biology. – *Trends in Ecology & Evolution* 23(3): 141–148.
- 710 Kozak, K. and Wiens, J. 2010a. Accelerated rates of climatic-niche evolution underlie rapid  
711 species diversification. – *Ecology Letters* 13(11): 1378–1389.
- 712 Kozak, K. H. and Wiens, J. J. 2010b. Niche conservatism drives elevational diversity patterns  
713 in Appalachian salamanders.. – *The American Naturalist* 176(1): 40–54.
- 714 Kraft, N., Cornwell, W., Webb, C. and Ackerly, D. 2007. Trait evolution, community  
715 assembly, and the phylogenetic structure of ecological communities. – *The American*  
716 *Naturalist* 170(2): 271–283.
- 717 Lawing, A. and Polly, P. 2011. Pleistocene Climate, Phylogeny, and Climate Envelope Models:  
718 An Integrative Approach to Better Understand Species' Response to Climate Change. –  
719 *PLoS one* 6(12): e28554.
- 720 Lewis, P. O. 2001. A likelihood approach to estimating phylogeny from discrete morphological  
721 character data. – *Systematic Biology* 50(6): 913–925.
- 722 Lo Presti, R. M. and Oberprieler, C. 2009. Evolutionary history, biogeography and  
723 eco-climatological differentiation of the genus *Anthemis* L.(Compositae, Anthemideae) in  
724 the circum-Mediterranean area. – *Journal of Biogeography* 36(7): 1313–1332.
- 725 Losos, J. 2008a. Phylogenetic niche conservatism, phylogenetic signal and the relationship  
726 between phylogenetic relatedness and ecological similarity among species. – *Ecology Letters*  
727 11(10): 995–1003.
- 728 Losos, J. B. 2008b. Rejoinder to Wiens (2008): phylogenetic niche conservatism, its  
729 occurrence and importance. – *Ecology Letters* 11(10): 1005–1007.
- 730 — 2011. Seeing the forest for the trees: the limitations of phylogenies in comparative  
731 biology. – *The American Naturalist* 177(6): 709–727.
- 732 Maddison, W. 1991. Squared-change parsimony reconstructions of ancestral states for  
733 continuous-valued characters on a phylogenetic tree. – *Systematic Biology* 40(3): 304–314.
- 734 Maddison, W. P. and Maddison, D. R. 2001. Mesquite: a modular system for evolutionary  
735 analysis.. – .

- 736 Mahler, D. L., Revell, L. J., Glor, R. E. and Losos, J. B. 2010. Ecological opportunity and the  
737 rate of morphological evolution in the diversification of Greater Antillean anoles. –  
738 *Evolution* 64(9): 2731–2745.
- 739 Manly, B. F., McDonald, L. L. and Thomas, D. L. 1993. Resource selection by animals:  
740 Statistical design and analysis for field studies. – Chapman & Hall (London and New York).
- 741 Martins, E. 1999. Estimation of ancestral states of continuous characters: a computer  
742 simulation study. – *Systematic Biology* 48(3): 642–650.
- 743 — 2004. COMPARE, version 4.6 b. – Computer programs for the statistical analysis of  
744 comparative data. Distributed by the author at <http://compare.bio.indiana.edu/>.  
745 Department of Biology, Indiana University, Bloomington, IN .
- 746 Martins, E. and Hansen, T. 1997. Phylogenies and the comparative method: a general  
747 approach to incorporating phylogenetic information into the analysis of interspecific data. –  
748 *American Naturalist* 149(4): 646–667.
- 749 Matthiopoulos, J., Hebblewhite, M., Aarts, G. and Fieberg, J. 2011. Generalized functional  
750 responses for species distributions. – *Ecology* 92(3): 583–589.
- 751 Nyári, Á. S. and Reddy, S. 2013. Comparative Phyloclimatic Analysis and Evolution of  
752 Ecological Niches in the Scimitar Babblers (Aves: Timaliidae: Pomatorhinus). – *PloS one*  
753 8(2): e55629.
- 754 Oakley, T. H. and Cunningham, C. W. 2000. Independent contrasts succeed where ancestor  
755 reconstruction fails in a known bacteriophage phylogeny. – *Evolution* 54(2): 397–405.
- 756 O’Meara, B., Ané, C., Sanderson, M. and Wainwright, P. 2006. Testing for different rates of  
757 continuous trait evolution using likelihood. – *Evolution* 60(5): 922–933.
- 758 O’Meara, B. C. 2012. *CRAN task view: phylogenetics*. Version 2014-07-17.  
759 <http://cran.r-project.org/web/views/Phylogenetics.html>. – .
- 760 Pagel, M. 1997. Inferring evolutionary processes from phylogenies. – *Zoologica Scripta* 26(4):  
761 331–348.
- 762 — 1999. The maximum likelihood approach to reconstructing ancestral character states of  
763 discrete characters on phylogenies. – *Systematic Biology* 48(3): 612–622.

- 764 — 2002. Modelling the evolution of continuously varying characters on phylogenetic trees: the  
765 case of Hominid cranial capacity. – In: MacLeod, N. and Forey, P. L. (eds.), *Morphology,*  
766 *shape and phylogeny.* Taylor and Francis, London and New York, pp. 269–286.
- 767 Pagel, M. and Meade, A. 2007. BayesTraits. – Computer program and documentation  
768 available at <http://www.evolution.rdg.ac.uk/BayesTraits.html> .
- 769 Pagel, M., Meade, A. and Barker, D. 2004. Bayesian estimation of ancestral character states  
770 on phylogenies. – *Systematic Biology* 53(5): 673–684.
- 771 Pagel, M. et al. 1999. Inferring the historical patterns of biological evolution. – *Nature*  
772 401(6756): 877–884.
- 773 Paradis, E., Claude, J. and Strimmer, K. 2004. APE: analyses of phylogenetics and evolution  
774 in R language. – *Bioinformatics* 20: 289–290.
- 775 Pearman, P. B., D’Amen, M., Graham, C. H., Thuiller, W. and Zimmermann, N. E. 2010.  
776 Within-taxon niche structure: niche conservatism, divergence and predicted effects of  
777 climate change. – *Ecography* 33(6): 990–1003.
- 778 Pedersen, N., Holyoak, D. and Newton, A. 2007. Systematics and morphological evolution  
779 within the moss family Bryaceae: A comparison between parsimony and Bayesian methods  
780 for reconstruction of ancestral character states. – *Molecular Phylogenetics and Evolution*  
781 43(3): 891–907.
- 782 Pennell, M. W. and Harmon, L. J. 2013. An integrative view of phylogenetic comparative  
783 methods: connections to population genetics, community ecology, and paleobiology. –  
784 *Annals of the New York Academy of Sciences* 1289(1): 90–105.
- 785 Peterson, A. T., Soberón, J., Pearson, R. G., Anderson, R. P., Martínez-Meyer, E., Nakamura,  
786 M. and Araújo, M. B. 2011. *Ecological niches and geographic distributions.* – Princeton  
787 University Press, Princeton.
- 788 Posada, D. and Buckley, T. R. 2004. Model selection and model averaging in phylogenetics:  
789 advantages of Akaike information criterion and Bayesian approaches over likelihood ratio  
790 tests. – *Systematic Biology* 53(5): 793–808.
- 791 Price, T. 1997. Correlated evolution and independent contrasts. – *Philosophical Transactions*  
792 *of the Royal Society of London. Series B* 352(1352): 519–529.

- 793 Réale, D., McAdam, A. G., Boutin, S. and Berteaux, D. 2003. Genetic and plastic responses  
794 of a northern mammal to climate change. – Proceedings of the Royal Society of London.  
795 Series B 270(1515): 591–596.
- 796 Revell, L. 2007. Testing the genetic constraint hypothesis in a phylogenetic context: a  
797 simulation study. – Evolution 61(11): 2720–2727.
- 798 Revell, L., Harmon, L. and Collar, D. 2008. Phylogenetic signal, evolutionary process, and  
799 rate. – Systematic Biology 57(4): 591–601.
- 800 Revell, L. J. 2012. phytools: an R package for phylogenetic comparative biology (and other  
801 things). – Methods in Ecology and Evolution 3(2): 217–223.
- 802 — 2014. Ancestral character estimation under the threshold model from quantitative  
803 genetics. – Evolution 68(3): 743–759.
- 804 Rice, N., Martínez-Meyer, E. and Peterson, A. 2003. Ecological niche differentiation in the  
805 Aphelocoma jays: a phylogenetic perspective. – Biological Journal of the Linnean Society  
806 80(3): 369–383.
- 807 Rivera, P., Di Cola, V., Martínez, J., Gardenal, C. and Chiaraviglio, M. 2011. Species  
808 Delimitation in the Continental Forms of the Genus *Epicrates* (Serpentes, Boidae)  
809 Integrating Phylogenetics and Environmental Niche Models. – PLoS one 6(9): e22199.
- 810 Ronquist, F. 2004. Bayesian inference of character evolution. – Trends in Ecology & Evolution  
811 19(9): 475–481.
- 812 Roquet, C., Thuiller, W. and Lavergne, S. 2012. Building megaphylogenies for macroecology:  
813 taking up the challenge. – Ecography 36(1): 013–026.
- 814 Schluter, D., Price, T., Mooers, A. and Ludwig, D. 1997. Likelihood of ancestor states in  
815 adaptive radiation. – Evolution 51(6): 1699–1711.
- 816 Schnitzler, J., Graham, C. H., Dormann, C. F., Schifffers, K. and Peter Linder, H. 2012.  
817 Climatic niche evolution and species diversification in the Cape flora, South Africa. –  
818 Journal of Biogeography 39(12): 2201–2211.
- 819 Schwarz, G. 1978. Estimating the dimension of a model. – The Annals of Statistics 6(2):  
820 461–464.

- 821 Seddon, A. W., Mackay, A. W., Baker, A. G., Birks, H. J. B., Breman, E., Buck, C. E., Ellis,  
822 E. C., Froyd, C. A., Gill, J. L., Gillson, L. et al. 2014. Looking forward through the past:  
823 identification of 50 priority research questions in palaeoecology. – *Journal of Ecology* 102(1):  
824 256–267.
- 825 Simpson, G. G. 1944. *Tempo and mode in evolution*. – vol. 15. Columbia University Press,  
826 New York.
- 827 Slater, G. J., Harmon, L. J. and Alfaro, M. E. 2012. Integrating fossils with molecular  
828 phylogenies improves inference of trait evolution. – *Evolution* 66(12): 3931–3944.
- 829 Slater, G. J. and Pennell, M. W. 2013. Robust Regression and Posterior Predictive Simulation  
830 Increase Power to Detect Early Bursts of Trait Evolution. – *Systematic Biology* p. synt066.
- 831 Slater, G. J., Price, S. A., Santini, F. and Alfaro, M. E. 2010. Diversity versus disparity and  
832 the radiation of modern cetaceans. – *Proceedings of the Royal Society B: Biological Sciences*  
833 277(1697): 3097–3104.
- 834 Smith, S. and Beaulieu, J. 2009. Life history influences rates of climatic niche evolution in  
835 flowering plants. – *Proceedings of the Royal Society B* 276(1677): 4345–4352.
- 836 Smith, S. and Donoghue, M. 2010. Combining historical biogeography with niche modeling in  
837 the *Caprifolium* clade of *Lonicera* Caprifoliaceae, Dipsacales). – *Systematic Biology* 59(3):  
838 322–341.
- 839 Smith, S. A. and Donoghue, M. J. 2008. Rates of molecular evolution are linked to life history  
840 in flowering plants. – *Science* 322(5898): 86–89.
- 841 Soberón, J. and Nakamura, M. 2009. Niches and distributional areas: concepts, methods, and  
842 assumptions. – *Proceedings of the National Academy of Sciences* 106(Supplement 2):  
843 19644–19650.
- 844 Thomas, G. and Freckleton, R. 2011. MOTMOT: models of trait macroevolution on trees. –  
845 *Methods in Ecology and Evolution* 3(1): 145–151.
- 846 Thomas, G. H., Freckleton, R. P. and Székely, T. 2006. Comparative analyses of the influence  
847 of developmental mode on phenotypic diversification rates in shorebirds. – *Proceedings of*  
848 *the Royal Society B* 273(1594): 1619–1624.

- 849 Thuiller, W., Lavergne, S., Roquet, C., Boulangeat, I., Lafourcade, B. and Araujo, M. 2011.  
850 Consequences of climate change on the tree of life in Europe. – *Nature* 470(7335): 531–534.
- 851 Töpel, M., Antonelli, A., Yesson, C. and Eriksen, B. 2012. Past Climate Change and Plant  
852 Evolution in Western North America: A Case Study in Rosaceae. – *PLoS one* 7(12): e50358.
- 853 Veloz, S. D., Williams, J. W., Blois, J. L., He, F., Otto-Bliesner, B. and Liu, Z. 2012.  
854 No-analog climates and shifting realized niches during the late quaternary: implications for  
855 21st-century predictions by species distribution models. – *Global Change Biology* 18(5):  
856 1698–1713.
- 857 Venditti, C., Meade, A. and Pagel, M. 2011. Multiple routes to mammalian diversity. – *Nature*  
858 479(7373): 393–396.
- 859 Verbruggen, H., Tyberghein, L., Pauly, K., Vlaeminck, C., Nieuwenhuyze, K., Kooistra, W.,  
860 Leliaert, F. and Clerck, O. 2009. Macroecology meets macroevolution: evolutionary niche  
861 dynamics in the seaweed *Halimeda*. – *Global Ecology and Biogeography* 18(4): 393–405.
- 862 Vieites, D., Nieto-Román, S. and Wake, D. 2009. Reconstruction of the climate envelopes of  
863 salamanders and their evolution through time. – *Proceedings of the National Academy of*  
864 *Sciences* 106(Supplement 2): 19715–19722.
- 865 de Villemereuil, P., Wells, J. A., Edwards, R. D. and Blomberg, S. P. 2012. Bayesian models  
866 for comparative analysis integrating phylogenetic uncertainty. – *BMC Evolutionary Biology*  
867 12(1): 102.
- 868 Webster, A. J. and Purvis, A. 2002. Ancestral states and evolutionary rates of continuous  
869 characters. – In: MacLeod, N. and Forey, P. L. (eds.), *Morphology, shape and phylogeny*.  
870 Taylor and Francis, London and New York, pp. 247–268.
- 871 Wiens, J., Kuczynski, C., Duellman, W. and Reeder, T. 2007. Loss and re-evolution of  
872 complex life cycles in marsupial frogs: does ancestral trait reconstruction mislead?. –  
873 *Evolution* 61(8): 1886–1899.
- 874 Wiens, J. J. 2008. Commentary on Losos (2008): niche conservatism déjà vu. – *Ecology*  
875 *Letters* 11(10): 1004–1005.

- 876 Wiens, J. J., Ackerly, D. D., Allen, A. P., Anacker, B. L., Buckley, L. B., Cornell, H. V.,  
877 Damschen, E. I., Jonathan Davies, T., Grytnes, J.-A., Harrison, S. P. et al. 2010. Niche  
878 conservatism as an emerging principle in ecology and conservation biology. – *Ecology*  
879 *Letters* 13(10): 1310–1324.
- 880 Wiens, J. J., Kozak, K. H. and Silva, N. 2013. Diversity and niche evolution along aridity  
881 gradients in North American lizards (Phrynosomatidae). – *Evolution* 67(6): 1715–1728.
- 882 Williams, J. W. and Jackson, S. T. 2007. Novel climates, no-analog communities, and  
883 ecological surprises. – *Frontiers in Ecology and the Environment* 5(9): 475–482.
- 884 Williams, J. W., Jackson, S. T. and Kutzbach, J. E. 2007. Projected distributions of novel  
885 and disappearing climates by 2100 AD. – *Proceedings of the National Academy of Sciences*  
886 104(14): 5738–5742.
- 887 Williams, J. W., Shuman, B. N. and Webb III, T. 2001. Dissimilarity analyses of  
888 late-Quaternary vegetation and climate in eastern North America. – *Ecology* 82(12):  
889 3346–3362.
- 890 Wright, S. 1934. An analysis of variability in number of digits in an inbred strain of guinea  
891 pigs. – *Genetics* 19(6): 506.
- 892 Yesson, C. and Culham, A. 2006a. Phyloclimatic modeling: combining phylogenetics and  
893 bioclimatic modeling. – *Systematic Biology* 55(5): 785–802.
- 894 — 2006b. A phyloclimatic study of *Cyclamen*. – *BMC Evolutionary Biology* 6(1): 72.



## Tables

895 Table 1: Reconstruction outcome from different methods for continuous characters. Under default conditions -  
 896 untransformed ultrametric tree and/or no model specification - all methods will produce roughly the same  
 897 ancestral states, as all assume Brownian motion model of evolution. Note: independent contrast (IC) method  
 898 will yield the same ancestral state estimates as the other methods only when each node of the tree is separately  
 899 re-rooted during the reconstruction process (Maddison, 1991; Garland et al., 1997). Weighted squared-change  
 900 parsimony (WSqCP) and independent contrasts can also assume different models of evolution by reconstructing  
 901 the trait values on a transformed phylogeny. Bayesian estimate can lead to a different result under the same  
 902 model due to different prior distributions for model parameters.

|                         |   |                            |   |         |   |          |   |               |
|-------------------------|---|----------------------------|---|---------|---|----------|---|---------------|
| IC [untransformed tree] | ≈ | WSqCP [untransformed tree] | = | ML [BM] | = | GLS [BM] | ≈ | Bayesian [BM] |
| IC [OU tree]            | ≈ | WSqCP [OU tree]            | = | ML [OU] | = | GLS [OU] | ≈ | Bayesian [OU] |

903 Table 2: A proposal of best practice and data format for phylogenetic comparative studies

|                                             | <b>Best choice</b>                                                                 | <b>Alternative</b>                |
|---------------------------------------------|------------------------------------------------------------------------------------|-----------------------------------|
| <b>Phylogeny</b>                            | Sample of trees<br>Chronogram                                                      | Single tree<br>Phylogram/topology |
| <b>Climate niche from occurrence data</b>   | Modelled data                                                                      | Raw data                          |
| <b>Climate niche from experimental data</b> | Direct measures                                                                    | -                                 |
| <b>Niche statistics</b>                     | Empirical distribution                                                             | Point values                      |
| <b>Evolutionary model</b>                   | Selected according to prior knowledge,<br>followed by model selection based on fit | No selection                      |
| <b>Ancestral niche projection</b>           | To paleoclimate maps, if reliable                                                  | To present-day maps               |
| <b>Validation</b>                           | Fossil records                                                                     | -                                 |

904 Table 3: List of studies reconstructing the ancestral climate niche in chronological order. The fields with missing values indicate either that the tests were not performed or  
 905 no information is available in the text. An overview of R packages implementing comparative phylogenetic methods is available in O'Meara (2012).

| Study                       | Phylogeny                | N° of species       | Niche representation                       | Reconstruction method     | Model selection/<br>additional indices | Software |
|-----------------------------|--------------------------|---------------------|--------------------------------------------|---------------------------|----------------------------------------|----------|
| Rice et al. (2003)          | Phylogram                | 19                  | Modelled mean and st. error                | GLS (BM)                  | Randomization                          | Compare  |
| Graham et al. (2004)        | Phylogram                | 2,3,5               | Raw min/max values                         | ML/GLS (BM)               | LR                                     |          |
| Hoffmann (2005)             | Phylogram                | 15                  | Raw distribution                           | SqCP                      |                                        | MacClade |
| Edwards and Donoghue (2006) | Phylogram                | 9, 8                | Mean climatic and physiological parameters | GLS (BM,OU <sub>1</sub> ) |                                        | Compare  |
| Yesson and Culham (2006b)   | Topology                 | 21                  | Mean/st.dev/min/max of raw data            | SqCP                      | Randomization                          | Mesquite |
| Yesson and Culham (2006a)   | Chronogram               | 45                  | Mean/st.dev/min/max of raw data            | SqCP                      | Randomization                          | Mesquite |
| Eaton et al. (2008)         | Phylogram                | 19,23,39            | PC axes centroids                          | SqCP (BM)                 |                                        | Mesquite |
| Crisp et al. (2009)         | Chronogram/<br>phylogram | 11064 in 4<br>trees | 7 biomes                                   | SqCP, ML (Mk1)            | Randomization                          | Mesquite |

Table 3: continued

| Author (Year)                    | Chronogram              | n                    | Modelled distribution                    | ML (BM)                 | MDI <sup>1</sup>                                               | R <sup>2</sup>                    |
|----------------------------------|-------------------------|----------------------|------------------------------------------|-------------------------|----------------------------------------------------------------|-----------------------------------|
| Evans et al. (2009)              | Chronogram              | 20                   | Raw mean, min, max values                | SqCP                    | QVI, K                                                         | Mesquite                          |
| Lo Presti and Oberprieler (2009) | Chronogram              | 147                  | Raw mean, min, max values                | SqCP                    | QVI, K                                                         | Mesquite                          |
| Smith and Beaulieu (2009)        | Chronogram<br>phylogram | 301,351,<br>889,3174 | PC axes                                  | GLS (BM)                | Disparity ratios,<br>rates of evolution<br>(AIC <sub>c</sub> ) | R, Brownie                        |
| Verbruggen et al. (2009)         | Chronogram              | 52                   | Raw mean/min/max                         | ML                      | $\lambda, K, LR$                                               | R <sup>3</sup>                    |
| Vieites et al. (2009)            | Chronogram              | 80                   | Raw mean, 95% CI                         | ML (BM)                 | $\lambda, K, \delta, LR$                                       | Mesquite                          |
| Edwards and Smith (2010)         | Chronogram<br>sample    | 1230, 299            | C3/C4 physiology,<br>mean climate values | IC/ML (BM), ML<br>(OU2) | AIC <sub>c</sub>                                               | Phylocom,<br>LASRdisc,<br>Brownie |
| Jakob et al. (2010)              | Chronogram<br>sample    | 12                   | Modelled distribution                    | GLS (BM)                |                                                                | R <sup>4</sup>                    |

<sup>1</sup>Morphological Disparity Index calculated in R package Geiger

<sup>2</sup>geiger

<sup>3</sup>ape, geiger

<sup>4</sup>phyloclim

Table 3: continued

| Smith and Donoghue (2010)  | Chronogram sample | 19     | Modelled distribution       | ML (BM)                   | Niche overlap/ similarity/equivalency   |
|----------------------------|-------------------|--------|-----------------------------|---------------------------|-----------------------------------------|
| Boucher et al. (2012)      | Chronogram sample | 51     | OMI                         | JL (OU3)                  | AICc R <sup>5</sup>                     |
| Bystriakova et al. (2011)  | Phylogram         | 53     | Mean values/OMI centroids   | ML (BM)                   | Permutation R <sup>6</sup>              |
| Holstein and Renner (2011) | Chronogram        | 24     | Biomes                      | ML (Mk1)                  | Randomization Mesquite                  |
| Rivera et al. (2011)       | Phylogram         | 5      | Raw mean                    | GLS (BM)                  | Compare                                 |
| Heibl and Renner (2012)    | Chronogram sample | 43     | Biomes                      | ML, Bayesian RJMCMC (Mk1) | AICc Bayestrats                         |
| Kellermann et al. (2012)   | Chronogram        | 92, 95 | Cold/dessication resistance | ML (BM)                   | $K, \lambda$ , Moran's I R <sup>7</sup> |
| Schnitzler et al. (2012)   | Chronogram sample | 89     | Raw mean values             | PIC (BM,OU)               | $\lambda, AIC_c$ R <sup>8</sup>         |

<sup>5</sup> ade4, ape, geiger, picante, diversitree

<sup>6</sup> ape

<sup>7</sup> picante, geiger

<sup>8</sup> ape

Table 3: continued

|                            |                   |                |                           |                           |                                    |
|----------------------------|-------------------|----------------|---------------------------|---------------------------|------------------------------------|
| Töpel et al. (2012)        | Chronogram        | 38             | Min, max values           | ML (BM)                   | R <sup>9</sup>                     |
| Ahmadzadeh et al. (2013)   | Chronogram sample | 8              | Modelled                  | ML (BM)                   | R <sup>10</sup>                    |
| Koecke et al. (2013)       | Chronogram        | 19             | Modelled distribution     | ML (BM)                   | R <sup>11</sup>                    |
| Nyári and Reddy (2013)     | Chronogram        | 29             | Modelled distribution     | ML (BM)                   | R <sup>12</sup>                    |
| Wiens et al. (2013)        | Chronogram        | 117            | Raw mean values           | GLS (OU <sub>1</sub> )    | Compare, R <sup>13</sup>           |
| Guerrero et al. (2013)     | Chronogram        | 73, 96, 25, 24 | Raw mean, min, max values | GLS (BM,OU <sub>1</sub> ) | Compare, R <sup>14</sup>           |
| Jara-Arancio et al. (2014) | Chronogram        | 17,25          | Biomes,raw median values  | MP,ML,GLS (OU)            | Mesquite,R <sup>15</sup> , Compare |

<sup>9</sup>ape

<sup>10</sup>phyloclim

<sup>11</sup>Phyloclim

<sup>12</sup>Phyloclim, Phyloch

<sup>13</sup>ape,geiger

<sup>14</sup>geiger

<sup>15</sup>OUCH

## Figure legends

Figure 1: Climatic space represents all the combinations of two climatic variables existing at a certain time, which may differ at different times in history ( $t_1$ ,  $t_2$ ). The fundamental niche of a species includes all the possible conditions where a species could persist, some of which may lie outside conditions currently existing in the world. The intersection of the two represents the potential niche, which the species would fill in the absence of biotic interactions and dispersal limitations. The realized niche is the segment actually occupied by the species; it may occasionally extend towards climatic conditions outside its fundamental niche if facilitative biotic interactions are present. Adapted from Jackson and Overpeck (2000).

Figure 2: A hypothetical illustration of different degrees of phylogenetic signal. (a) Situation where trait values follow the expectations of a BM model of evolution (i.e. traits similarity is proportional to shared evolutionary history among species). (b) Strong phylogenetic signal is found when the trait values among closely related species are more similar than would be expected from BM. (c) A situation with no or low phylogenetic signal as a consequence of over-dispersion or convergence to habitat-specific trait values. Closely related species are not more similar than species drawn at random. (d) No phylogenetic signal as a consequence of trait stasis or convergence of all the species to the same trait value. (e) A signal (or its absence) may be restricted to a specific clade of a phylogenetic tree.

Figure 3: Climate niche representation. Niches are inferred by combining a) species distribution maps with b) climatic layers (temperature, precipitation, etc). c) The simplest niche representation that combines those data can be plotted as a histogram, with grey bars being the number of species occurrences at a certain temperature and white bars representing the entire area. Alternatively, niches can be statistically modeled, as shown in diagram d). The parameters finally obtained from those two approaches, in this example the mean values, may differ. Fig d) illustrates why the mean value is not necessarily the optimal statistic; instead reconstructing the whole distribution is preferable.

Figure 4: Evolutionary processes shaping the evolution of species traits are approximated by evolutionary models. Some processes, such as adaptive radiation or speciation processes can be approximated or tested by a number of slightly different models. See Box 1 for abbreviations and details.

Figure 5: Fitting the evolutionary models to data. Based on prior biological knowledge plausible evolutionary processes responsible for shaping the evolution of species traits are identified, and the corresponding evolutionary models are fitted to the data (see Fig. 4 for a readable version of this step). The model that fits best to the data (trait values and phylogeny) is commonly selected with likelihood ratio test (LRT), or with model selection criteria such as Akaike information criterion (AIC) or Schwarz criterion (SC=BIC).

## Figures

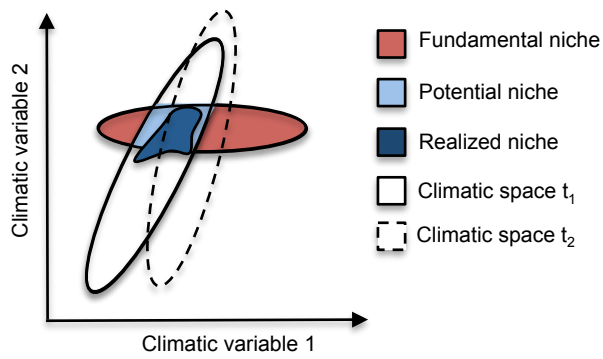

Figure 1:

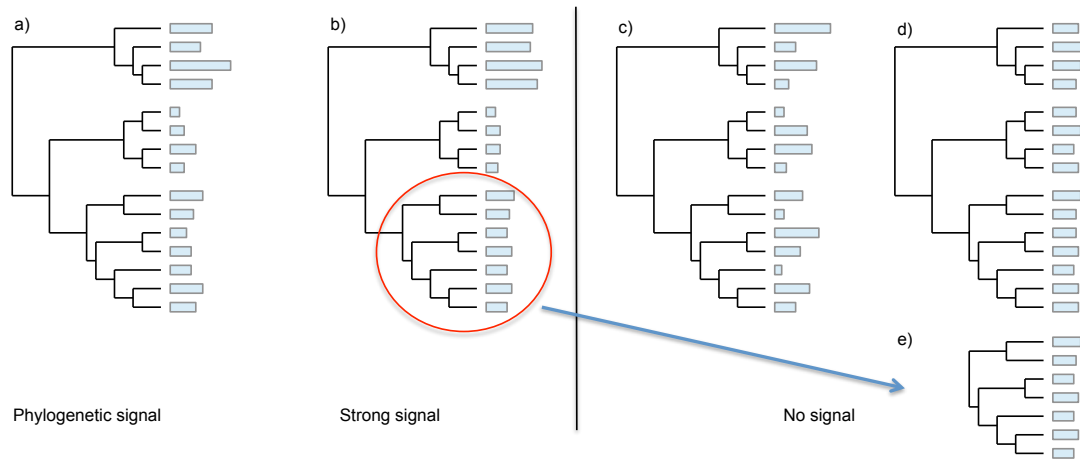

Figure 2:



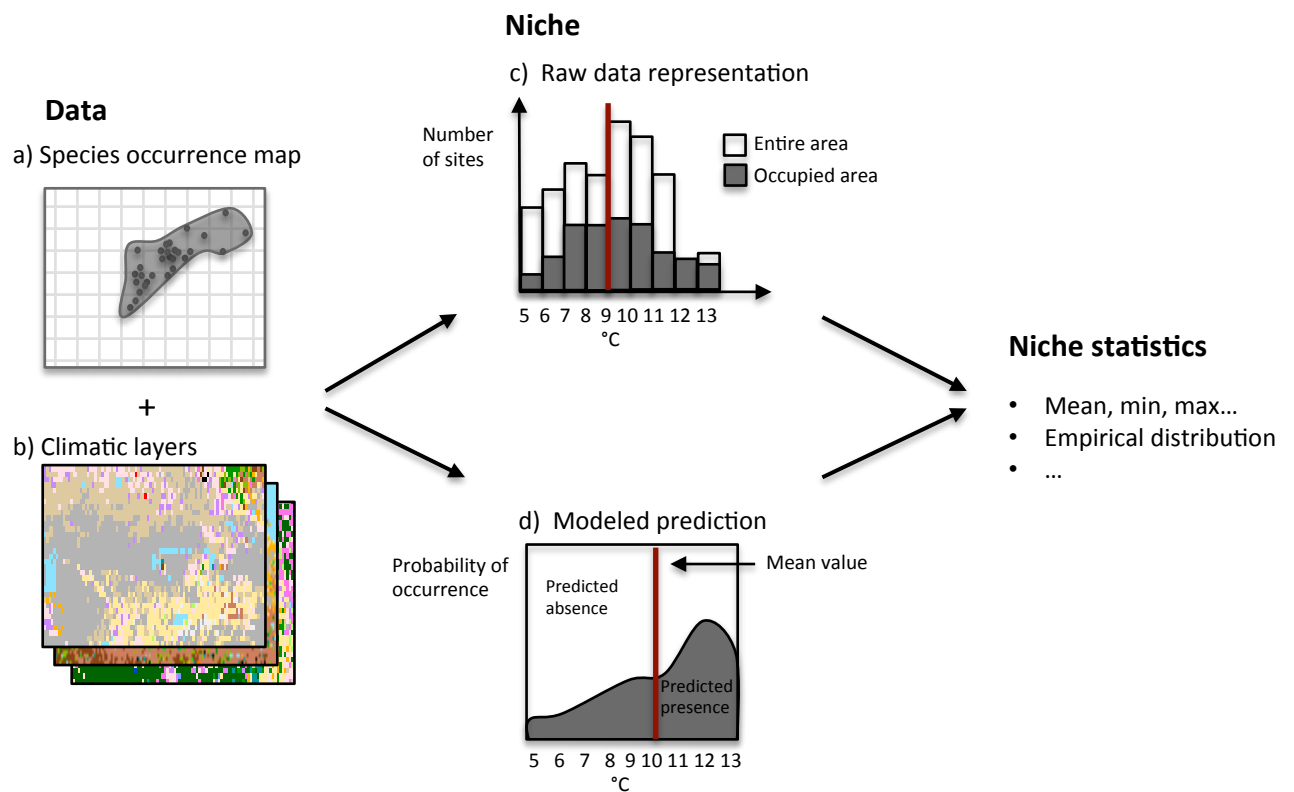

Figure 3:

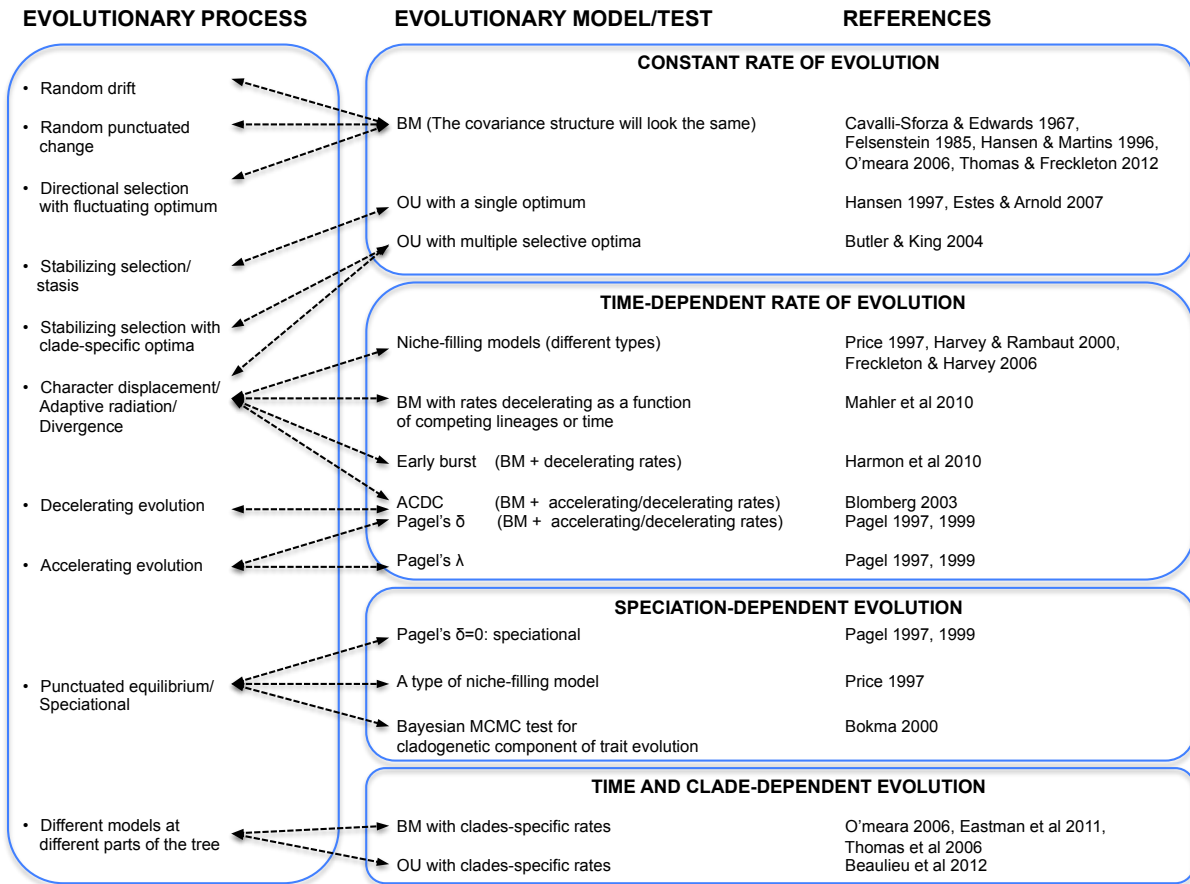

Figure 4:

Identifying plausible evolutionary processes

Model fitting

Model evaluation

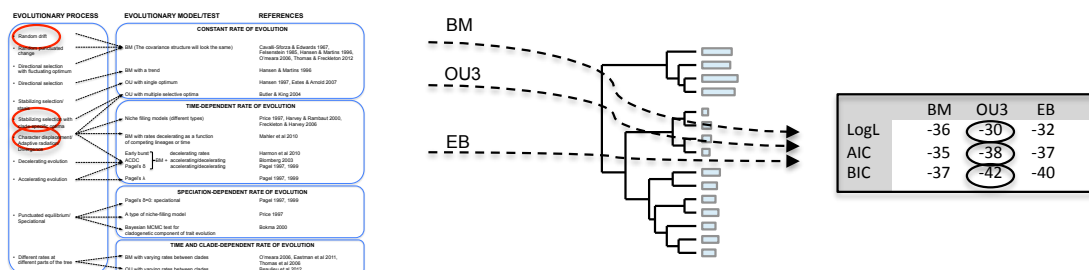

Figure 5:
